1 Characteristic changes in EEG spectral powers of patients with opioid-use disorder as  
2 compared with those with methamphetamine- and alcohol-use disorders

3

4 Christopher Minnerly<sup>1,3</sup>, Ibrahim M. Shokry<sup>1,2</sup>, William To<sup>1</sup>, John J Callanan<sup>2</sup>, Rui Tao<sup>1,\*</sup>

5

6 <sup>1</sup> Charles E. Schmidt College of Medicine, Florida Atlantic University, Boca Raton,  
7 Florida, USA.

8 <sup>2</sup> Ross University School of Veterinary Medicine, St. Kitts, West Indies.

9 <sup>3</sup> FHEHealth, Deerfield Beach, Florida, USA.

10

11

12

13 **\*For correspondence:**

14 Email: [rtao@health.fau.edu](mailto:rtao@health.fau.edu) (RT)

15

16

## 17 **Abstract**

18 Electroencephalography (EEG) likely reflects activity of cortical neurocircuits,  
19 making it an insightful estimation for mental health in patients with substance use  
20 disorder (SUD). EEG signals are recorded as sinusoidal waves, containing spectral  
21 amplitudes across several frequency bands with high spatio-temporal resolution. Prior  
22 work on EEG signal analysis has been made mainly at individual electrodes. These  
23 signals can be evaluated from advanced aspects, including sub-regional and hemispheric  
24 analyses. Due to limitation of computational techniques, few studies in earlier work could  
25 conduct data analyses from these aspects. Therefore, EEG in patients with SUD is not  
26 fully understood. In the present retrospective study, spectral powers from a data house  
27 containing opioid (OUD), methamphetamine/stimulants (MUD), and alcohol use disorder  
28 (AUD) were extracted, and then converted into five distinct topographic data (i.e.,  
29 electrode-based, cortical subregion-based, left-right hemispheric, anterior-posterior  
30 based, and total cortex-based analyses). We found that EEG spectral powers in patients  
31 with OUD were significantly different from those with MUD or AUD. Differential  
32 changes were observed from multiple perspectives, including individual electrodes,  
33 subregions, hemispheres, anterior-posterior cortices, and across the cortex as a whole.  
34 Understanding the differential changes in EEG signals may be useful for future work  
35 with machine learning and artificial intelligence (AI), not only for diagnostic but also for  
36 prognostic purposes in patients with SUD.

37

## 38 **Introduction**

39 EEG was discovered in the 1920's, and explored for biomedical purposes since the  
40 1930's (Ahmed & Cash, 2013; Stone & Hughes, 2013). Signals are primarily derived  
41 from cortical pyramidal neurons that generate postsynaptic potentials propagated towards  
42 the apical dendrites perpendicular to the cortical surface. Graphic waves vary irregularly,  
43 reflecting the net change between inhibitory and excitatory postsynaptic potentials in a  
44 temporal- and spatial-dependent manner. Thus, unlike magnetic resonance imaging  
45 (MRI) or positron emission tomography (PET), raw data are hardly interpretable, but  
46 require decomposition and then further reorganized into graphic images (Liu *et al.*,

47 2016). Current computational methods make it possible for signals to be easily  
48 reprocessed and transformed into interpretable spectral images into at least one of three  
49 distinct methods. The most common method is to analyze constituents of spectra (i.e.,  
50 frequency bands) including delta/ $\delta$ , 0.1-4.0 Hz; theta/ $\theta$ , 4.0-8.0 Hz; alpha/ $\alpha$ , 8.0-12.0 Hz;  
51 beta/ $\beta$ , 12.0-25 Hz; gamma/ $\gamma$ , >25 Hz. Changes in frequency bands are commonly used  
52 in sleep and arousal investigation. Compared to healthy adults, patients with an arousal  
53 disorder had an excessive amount of slow-wave sleep (SWS; mainly delta/ $\delta$  waves)  
54 interruption (Baldini *et al.*, 2019). The next method is the event-related potential (ERP)  
55 by determining the signal-to-noise ratio of the EEG signals at a given time associated  
56 with a specific stimulus, which has become a popular tool in the study of sensory,  
57 cognitive, or motor events. For example, positive potentials at 300 msec (P300) are  
58 currently used for a schizophrenia biomarker in patients examined in clinical settings  
59 (Chun *et al.*, 2013; Dvey-Aharon *et al.*, 2015; Turetsky *et al.*, 2015; Shim *et al.*, 2016).  
60 Thirdly, EEG signals are transformed and quantified into a color-specific topographic  
61 map, which is associated with respective cortical activity (Duru *et al.*, 2009; Taylor &  
62 Garrido, 2020). In epilepsy, topographic images provide a guide to remove epileptogenic  
63 zones during brain surgery (Pittau *et al.*, 2014; Plummer *et al.*, 2019).

64 EEG as a powerful tool used to study opioid- (OUD), methamphetamine- (MUD),  
65 and alcohol-use disorders (AUD) has been ventured over the past few decades. Most  
66 efforts were made to identify frequency bands in relationship with EEG potentials in the  
67 closed-eye (i.e., resting) state. Opioid abuse can cause a loss of GABAergic inhibitory  
68 control over postsynaptic excitatory potentials, including cortical pyramidal neurons  
69 [(Liao *et al.*, 2005); also reviewed by Baldo *et al.*, 2016], resulting in an alteration of  
70 electrical synchronization between cortical neurons. By analysis of delta/ $\delta$ , theta/ $\theta$ ,  
71 alpha/ $\alpha$ , beta/ $\beta$ , and gamma/ $\gamma$  waves, it was found that all of the five spectral powers was  
72 elevated with almost equipotency in the frontal, central, temporal, parietal, and occipital  
73 subregions of patients with OUD (Wang *et al.*, 2015). However, others demonstrated that  
74 it was only certain spectra, but not all, that were elevated in the cortical subregions  
75 (Polunina & Davydov, 2004; Greenwald & Roehrs, 2005; Motlagh *et al.*, 2018; Minnerly  
76 *et al.*, 2019). The selective effects are also reported in MUD and AUD.

77 Methamphetamine (METH) exposure for a long period time may cause a reduction in

78 dopamine transporters in the brain (McCann *et al.*, 1998). Newton et al (2003) showed  
79 that the delta/ $\delta$  and theta/ $\theta$  bands, but not others, were elevated almost globally in the  
80 cortical subregions (Newton *et al.*, 2003). The findings were partly supported by  
81 Khajehpour et al (2019), showing that delta/ $\delta$  and gamma/ $\gamma$  powers were slightly, yet  
82 significantly, increased in a topographic analysis (Khajehpour *et al.*, 2019). Alcohol is  
83 believed to be inhibitory, mimicking GABA's effect on postsynaptic GABA<sub>A</sub> receptors  
84 (Olsen & Liang, 2017). The gamma/ $\gamma$  powers, but not other frequency bands, were  
85 elevated across the cortex of patients with AUD (Bauer, 2001). However, Ko and Park  
86 showed that there was a reduction in alpha/ $\alpha$  power while an increase in gamma/ $\gamma$  powers  
87 (Ko & Park, 2018). Interestingly, by analyzing EEG obtained from 191 male alcoholic  
88 patients, Coutin-Churchman et al. revealed that the most frequent reduction took place in  
89 the delta/ $\delta$  and theta/ $\theta$  bands (Coutin-Churchman *et al.*, 2006). Nevertheless, although  
90 EEG has been used as a tool to estimate mental health, there has been no consensus on  
91 spectral powers altered in patients with SUD (i.e., OUD, MUD, or AUD).

92 Previous research typically focused on EEG signals at single electrodes or  
93 topographically, rarely having views from multiple aspects. In this work, we sought to  
94 characterize EEG signals in patients with OUD in contrast to those obtained from MUD  
95 or AUD. An advantage of the comparative study was that EEG was collected at the same  
96 rehabilitation facility and thus, data treatment was standardized for each group. To get  
97 insight into status of these patients, we sought to decompose the EEG signals in different  
98 aspects. With this goal in mind, EEG signals obtained from 19 electrodes were first  
99 broken down into 5 spectra (i.e., delta/ $\delta$ , theta/ $\theta$ , alpha/ $\alpha$ , beta/ $\beta$ , and gamma/ $\gamma$ ), and then  
100 re-arranged, combined, and mapped topographically. Thus, EEG signals obtained from  
101 patients with OUD were panoramically analyzed from multiple aspects, and compared  
102 with those with MUD or AUD.

103

104

## 105 **Materials and Methods**

### 106 **Patients**

107 Data were obtained from an electronic medical data house at a substance abuse  
108 treatment facility (FHE Health, Deerfield Beach, FL, USA), which had gathered ~1000  
109 cases of information about patients' drug use history, DMS-5 diagnosis, and drug  
110 intoxication treatment. In addition, there were 20 cases obtained from healthy subjects  
111 with no substance abuse history. EEG data prior to treatment were tracked electronically,  
112 along with information about detox-related symptoms. Searches with opioid-related  
113 keywords (i.e., morphine, heroin, fentanyl, methadone or oxycodone) found 350 patients  
114 who had records of opioid use history. Approximately 450 patients had records of alcohol  
115 use history. Methamphetamine-related keywords (i.e., crystal meth, meth, ice) yielded  
116 approximately 100 records of METH use history, while the remaining cases were a mix  
117 of substance use disorders. To this end, thirteen men and seven women identified as OUD  
118 were compared with 20 sex- and age-matched healthy controls (Table 1); fifteen patients  
119 identified as MUD; and twenty-three as AUD were compared to those with OUD.  
120 Protocols of retrospective analysis of living subjects were approved by the institutional  
121 review board (IRB) from Florida Atlantic University (Boca Raton, FL, USA) and Ross  
122 University School of Veterinary Medicine (St. Kitts, West Indies).

123

124 **Table 1.** Health profile of subjects used in the studies

|                                           | CTL<br>(N=20)  | OUD<br>(N=20)                      | MUD<br>(N=15) | AUD<br>(N=23)  | P (vs. CTL) |
|-------------------------------------------|----------------|------------------------------------|---------------|----------------|-------------|
| Age (years)                               | 33 ( $\pm$ 12) | 34 ( $\pm$ 12)                     | 29 ( $\pm$ 8) | 38 ( $\pm$ 10) | >0.05       |
| Sex (M/F)                                 | 13/7           | 13/7                               | 11/4          | 17/6           | n/a.        |
| Duration of<br>substances<br>used (Years) | 0              | 7 ( $\pm$ 5)                       | 5 ( $\pm$ 3)  | 9 ( $\pm$ 7)   | <0.05       |
| Substances<br>used                        | no             | Morphine;<br>heroin,<br>oxycodone. | METH          | alcohol        | n/a.        |

125 n/a.; not applicable.

126

127 **EEG data acquisition**

128 EEG recordings were performed between 12:00 PM - 4:00 PM. Following  
129 instrumental calibration, a case (patient or healthy control) was seated in a comfortable  
130 chair in a dimmed recording room and the EEG procedures were orally instructed. A cap  
131 with 19 electrodes (Electro-Cap International, Eaton, OH, USA) was placed on the scalp  
132 (Fig 1A). To reduce muscle artifacts in the EEG signal, the participant was instructed to  
133 assume a comfortable position and to avoid movement. Signals were collected with the  
134 band-pass filter of 1-100 Hz at a rate of 256 Hz, and amplified with Neurofield's Q20  
135 amplifier (NeuroField Inc., Bishop, CA, USA; Fig 1B) using NeuroGuide software  
136 (Applied Neuroscience Inc., Tampa, FL, USA). Each subject underwent 10 minutes of  
137 EEG recording with eyes closed.

138

### 139 **EEG data analysis and rationale for five distinct approaches**

140 EEG data were downloaded from the database as described previously (Minnerly  
141 *et al.*, 2019). Briefly, raw data was edited using the editing tool within the NeuroGuide  
142 software to remove physical artifacts (including eye movement, jaw movement, and gross  
143 movement) and was then visually inspected. A 60-second epoch of quality data was  
144 gathered after removal of the aforementioned artifacts. Epoch selection was governed by  
145 reliability measures of the data within the NeuroGuide program. Test-retest values of  
146 0.90 or greater are considered highly reliable and valid according to literature (Thatcher,  
147 2010). Each epoch was subjected to EEG spectral power analysis, using a fast Fourier  
148 transform (FFT), and then extracted to Microsoft Excel for further data calculation.  
149 Powers of delta/ $\delta$  (1-4 Hz), theta/ $\theta$  (4-8 Hz), alpha/ $\alpha$  (8-12 Hz), beta/ $\beta$  (12-25Hz), and  
150 gamma/ $\gamma$  (25-50 Hz) oscillations were individually sorted according to electrodes and  
151 averaged (mean  $\pm$ SEM).

152 EEG signals, consisting of 5 spectral powers and 19 electrodes, were  
153 characterized in five distinct ways (Table 2). First, spectral powers at individual  
154 electrodes between healthy controls (CTL) and SUD were directly used for data  
155 comparison and analysis. This approach has been widely employed by many laboratories  
156 previously [for instance, (Polunina & Davydov, 2004; Greenwald & Roehrs, 2005)], and  
157 thus defined as Approach 1. The advantage of using Approach 1 was that no computation  
158 was required in the data analysis. However, since end data were at individual electrodes,

159 one would often find that EEG signals were significantly altered at some electrodes, but  
 160 not others. Given this, it could be difficult to draw conclusions of what happened in EEG  
 161 signaling. To solve this problem, new approaches of data analysis developed from four  
 162 additional approaches. Specifically at Approach 2, spectral power data were grouped into  
 163 1 (prefrontal; Fp1 and Fp2), 2 (frontal; F3, F4, F7, F8, and Fz), (central; C3, C4, Cz, T3,  
 164 and T4), 4 (temporal; T5 and T6), 5 (parietal; P3, P4, and Pz), and 6 (occipital; O1 and  
 165 O2). Next, EEG signals were viewed from the hemispheric level designated as Approach  
 166 3. Spectral data of Fp1, F3, F7, C3, T3, T5, P3, and O1 were grouped and expressed as  
 167 mean  $\pm$  SEM into data 1, and Fp2, F4, F8, C4, T4, T6, P4, and O2 into data 2 as the left  
 168 and right, respectively, hemispheric subregions. Note that data from the central  
 169 subregions (Fz, Cz, and Pz) were excluded from the analysis. Next, EEG signals were  
 170 viewed from an anterior-posterior aspect designated as Approach 4. EEG signals obtained  
 171 from Fp1, Fp2, F3, F4, Fz, F7, and F8 were grouped as mean  $\pm$  SEM representing  
 172 anterior EEG activity, while O1, O2, P3, P4, Pz, T5, and T6 grouped as the posterior  
 173 EEG activity. Note T3, T4, C3, C4, and Cz were excluded from the data analysis. Lastly,  
 174 spectral data was viewed as a whole, across the cortex designated as Approach 5. All of  
 175 19 electrodes was grouped as mean  $\pm$  SEM.

176

177 **Table 2.** Comparison of Approach 1-5 used in the present studies

| Approach | Main Features            | Advantage                                                                                    | Disadvantage                                                             |
|----------|--------------------------|----------------------------------------------------------------------------------------------|--------------------------------------------------------------------------|
| 1        | Electrode-based analysis | Less computation needed<br>Commonly used;<br>references available                            | A huge amount of end data<br>Hard to find difference between CTL and SUD |
| 2        | Cortex-based analysis    | EEG signals associated with specific cortices<br>Easy to find difference between CTL and SUD | Lack of details in EEG signals<br>Amount of end data is still huge.      |

|   |                                 |                                                                             |                                                                                      |
|---|---------------------------------|-----------------------------------------------------------------------------|--------------------------------------------------------------------------------------|
|   |                                 |                                                                             | Computational analysis<br>needed                                                     |
| 3 | Hemisphere-<br>based analysis   | Only two sets of end data<br>Easy to find difference<br>between CTL and SUD | Part of EEG signals<br>excluded from analysis<br>Comprehensive<br>computation needed |
| 4 | Anterior-<br>posterior analysis | Only two sets of end data<br>Easy to find difference<br>between CTL and SUD | Part of EEG signal<br>excluded from analysis<br>Comprehensive<br>computation needed  |
| 5 | Total cortex-<br>based analysis | A single set of end data<br>Easy to find difference<br>between CTL and SUD  | Lack of detailed<br>information<br>Likely misdiagnosis                               |

---

178

179

## 180 **Statistical analysis**

181 Data are expressed as mean  $\pm$  SEM, and evaluated with repeated measures  
182 ANOVA between CTL and SUD (OUD, MUD, and AUD) followed by *post-hoc* Fisher's  
183 PLSD test using StatView software 5.0 (SAS Institute Inc., Cary, NC, USA). If  
184 appropriate, unpaired Student *t*-test was also utilized to determine statistical difference.  
185 Significance was set at  $P < 0.05$ .

186

## 187 **Results**



## 188 **Characterization of EEG spectral powers at cortices of the** 189 **healthy brains**

190 Spectral power data obtained from 20 healthy controls with 19-channel caps are  
191 grouped into 5 bands (delta/ $\delta$ , 1-4 Hz; theta/ $\theta$ , 4-8 Hz; alpha/ $\alpha$ , 8-12 Hz; beta/ $\beta$ , 12-30  
192 Hz; and gamma/ $\gamma$ , 30-50 Hz), and further classified into 6 subgroups: the prefrontal (Fp;  
193 Fp1 and Fp2), frontal (F; F3, F4, F7, F8, and Fz), central (C; C3, C4, Cz, T3, and T4),  
194 temporal (T; T5, T6), parietal (P; P3, P4, and Pz), and occipital (O; O1 and O2).  
195 Statistical analysis reveals that amplitudes of spectral powers ( $\mu V^2$ ) of those 5 bands are  
196 significantly different in 6 cortical subregions [delta/ $\delta$ ,  $F_{(5,374)}=8.25$ ,  $P<0.0001$ ; theta/ $\theta$ ,  
197  $F_{(5,374)}=3.817$ ,  $P=0.0022$ ; alpha/ $\alpha$ ,  $F_{(5,374)}=9.185$ ,  $P<0.0001$ ; beta/ $\beta$ ,  $F_{(5,374)}=9.185$ ,  $P$   
198  $<0.0001$ ; gamma/ $\gamma$ ,  $F_{(5,374)}=2.969$ ,  $P=0.0121$ ). As shown in Fig 2, the y-axis displays  
199 spectral powers plotted against 6 cortical subregions displayed in x-axis. Except for the  
200 delta/ $\delta$  band, the greatest spectral powers of theta/ $\theta$ , alpha/ $\alpha$ , beta/ $\beta$ , and gamma/ $\gamma$  were  
201 found in the occipital (O) cortex. In contrast, the greatest delta/ $\delta$  powers (fig 2A) were in  
202 the prefrontal area, followed by the frontal, central, parietal, occipital, and temporal  
203 subregions. Interestingly, there exhibited a characteristic distribution of spectral power  
204 levels. As shown in the right panel of figure 1A, the delta/ $\delta$  power levels went from  
205 greatest to least in the anterior to posterior subregions and then to the lateral lobes (Fp  
206  $\rightarrow F \rightarrow Cz \rightarrow P \rightarrow O \rightarrow T$ ). In contrast, theta/ $\theta$  powers took nearly the opposite direction,  
207 from the posterior to anterior subregions and then to the lateral lobes (Fig 2B;  $O \rightarrow P$   
208  $\rightarrow Cz \rightarrow F \rightarrow Fp \rightarrow T$ ). Alpha/ $\alpha$  and beta/ $\beta$  powers had an identical direction of ranking  
209 orders, showing the posterior to central and lateral subregions, and finally to the anterior  
210 lobes (fig 2C-D;  $O \rightarrow P \rightarrow C \rightarrow T \rightarrow F \rightarrow Fp$ ). The direction utilized by gamma/ $\gamma$  was  
211 relatively complicated but still followed a pattern, showing the ranking orders from the  
212 occipital cortex to the lateral and then to the prefrontal cortex, from where direction  
213 changed to the central subregions (fig 2D;  $O \rightarrow T \rightarrow Fp \rightarrow F \rightarrow C \rightarrow P$ ).

214

215

## 216 **Approach 1: Electrode-based analysis**

217 Fig 3A displays a representative delta/ $\delta$  wave at the F3 electrode obtained from a  
218 healthy control (CTL) compared with individuals with OUD, MUD, or AUD. Compared  
219 to CTL, delta/ $\delta$  amplitudes were increased in patients with OUD or MUD, but not AUD.  
220 On the contrary, it was reduced in the AUD case. Next, the delta/ $\delta$  amplitude powers on  
221 F3 were grouped and statistical analysis conducted with a SAS software. As shown in Fig  
222 3B, the difference in delta/ $\delta$  amplitude powers was statistically significant [ $F_{(3, 74)} = 6.07$ ,  
223  $P = 0.0009$ ]. Post-hoc analysis indicates that only OUD, but not MUD or AUD, reached  
224 statistical significance difference from the CTL. To further reveal delta/ $\delta$  powers, data  
225 were normalized into %CTL. As shown in the right panel of Fig 3B, changes at the F3  
226 electrode were approximately 50%, 30%, and -30% relative to the CTL, in OUD, MUD,  
227 and AUD, respectively.

228

229 Next, we analyzed all 19 individual electrodes. Compared with the CTL, there  
230 were at least 10% increases in delta/ $\delta$  powers of patients with OUD, but not MUD or  
231 AUD. Specifically for OUD, 14 electrodes (73%) displayed at least 50% higher power  
232 than the CTL. However, only 7 electrodes (i.e., F3, F4, C3, C4, T4, P4, and Pz) reached  
233 statistical significance ( $P < 0.05$ ; ANOVA; Fig 3C-G). Although the rest of electrodes had  
234 no significant changes, their delta/ $\delta$  powers still followed the same pattern as indicated  
235 with the dash lines on the graphs.

236 Finally, effects of SUD on theta/ $\theta$  (Supplementary S1), alpha/ $\alpha$  (S2), beta/ $\beta$  (S3),  
237 and gamma/ $\gamma$  waves (S4) were compared with the CTL. Although there was a tendency,  
238 no statistically significant difference from the CTL was found any individual electrode ( $P$   
239  $> 0.05$ ; ANOVA).

240

## 241 **Approach 2: Cortex-based analysis**

242 Spectral power data are grouped into 1 (prefrontal; Fp1 and Fp2), 2 (frontal; F3,  
243 F4, F7, F8, and Fz), 3 (central; C3, C4, Cz, T3, and T4), 4 (temporal; T5 and T6), 5  
244 (parietal; P3, P4, and Pz), and 6 (occipital; O1 and O2). Fig 4 displays spectral powers  
245 ( $\mu V^2$ ) of those cortical subregions obtained from CTL compared with patients with OUD,

246 MUD, or AUD. Compared to CTL, it appears that OUD and MUD had elevated spectral  
247 powers for delta/ $\delta$  and theta/ $\theta$ , while reduced in alpha/ $\alpha$  powers. However, beta/ $\beta$  or  
248 gamma/ $\gamma$  powers could not be clearly determined with the analysis used in Approach 2.  
249 Statistical analysis reveals significant increases in delta/ $\delta$  powers [ $F_{(3, 74)}=6.753$ ,  $P$   
250  $=0.0004$ ], had no effect on theta/ $\theta$  [ $F_{(3, 74)}=2.224$ ,  $P=0.0924$ ]; alpha/ $\alpha$  ( $F_{(3, 74)}=1.605$ ,  $P$   
251  $=0.1955$ ); beta/ $\beta$ , ( $F_{(3, 74)}=0.732$ ,  $P=0.5359$ ); gamma/ $\gamma$ , ( $F_{(3, 74)}=0.732$ ,  $P=0.5359$ )].

252

253

### 254 **Approach 3: Analysis of the left-right hemisphere axis and** 255 **spectral powers**

256 In this section, spectral data were grouped and expressed as mean  $\pm$  SEM into 1  
257 and 2, respectively, representing the left and right hemispheres. Note that data from the  
258 central subregions (Fz, Cz, and Pz) were excluded from the analysis. Fig 5 displays  
259 spectral powers obtained from healthy controls (CTL) compared with individuals with  
260 OUD, MUD, or AUD. Analysis was performed from two aspects. First, we found that  
261 spectral powers of two hemispheres were almost at the same level, parallel to the x-axis.  
262 This suggests that substance use disorders (OUD, MUD, or AUD) did not have a  
263 selective effect on hemispheres. We next determined effects of substance use on spectral  
264 powers by analysis of y-axis. Compared to CTL, OUD and MUD had an increased power  
265 of delta/ $\delta$  (**A**) and theta/ $\theta$  (**B**), but a decreased alpha/ $\alpha$  power (**C**). In contrast, AUD  
266 showed a reduction in all three waves. However, only delta power reached statistical  
267 significance [left,  $F_{(3,620)}=36.748$ ,  $P<0.0001$ ; right,  $F_{(3,620)}=36.694$ ,  $P<0.0001$ ). Changes  
268 in beta/ $\beta$  (**D**) or gamma/ $\gamma$  powers (**E**) were not statistically significant.

269

270

### 271 **Approach 4: Analysis of the anterior-posterior axis and** 272 **spectral powers**

273 Data obtained from Fp1, Fp2, F3, F4, Fz, F7, and F8 were grouped as mean  $\pm$   
274 SEM representing for anterior signals, while O1, O2, P3, P4, Pz, T5, and T6 grouped as

275 the posterior activity. Note T3, T4, C3, C4, and Cz were excluded from the data analysis  
276 (Fig 6A).

277

278 First, the x-axis (horizontal) levels were analyzed. In the CTL group, we found  
279 that, except for the delta/ $\delta$  wave, the powers of theta/ $\theta$ , alpha/ $\alpha$ , beta/ $\beta$ , and gamma/ $\gamma$   
280 were greater at posterior regions than those at the anterior regions. However, powers of  
281 delta/ $\delta$  at the anterior regions were greater. We found that, except for the gamma/ $\gamma$  wave,  
282 the drug use disorders (OUD, MUD, or AUD) did not alter the relationship of the  
283 anterior-posterior axis. However, such relationship had been reversed in the gamma/ $\gamma$   
284 wave (**E**), showing that the anterior powers were elevated while posterior powers were  
285 reduced. Next, we conducted statistical analysis on the y-axis. There were significant  
286 main effects on the delta/ $\delta$  [**A**; 1=anterior,  $F_{(3,542)} = 26.001$ ,  $P < 0.0001$ ; 2=posterior,  $F_{(3,542)}$   
287  $= 36.308$ ,  $P < 0.0001$ ] and theta/ $\theta$  waves [**B**; 1=anterior,  $F_{(3,542)} = 21.036$ ,  $P < 0.0001$ ;  
288 2=posterior,  $F_{(3,542)} = 9.675$ ,  $P < 0.0001$ ]. Changes in alpha/ $\alpha$  (**C**), beta/ $\beta$  (**D**), or gamma/ $\gamma$   
289 (**E**) were not significant

290 Since the anterior-posterior relationship in gamma/ $\gamma$  waves were reversely altered  
291 in patients with SUD (i.e., OUD, MUD, or AUD), it prompted us to determine whether  
292 the reversed effect was statistically significant at individual cortices. Thus, the gamma/ $\gamma$   
293 data were decomposed, and then regrouped to 6 cortical subregions. As shown in Fig 7A,  
294 significant changes occurred in the frontal [ $F_{(3,386)} = 2.694$ ,  $P = 0.0458$ ), temporal ( $F_{(3,308)}$   
295  $= 4.18$ ,  $P = 0.0064$ ), and occipital ( $F_{(3,152)} = 4.225$ ,  $P = 0.0067$ ), but not prefrontal ( $F_{(3,152)}$   
296  $= 1.382$ ,  $P = 0.2505$ ) nor central subregions ( $F_{(3,230)} = 3.067$ ,  $P = 0.0285$ ]. Topographic  
297 analysis (Fig 7B) revealed that the lowest gamma/ $\gamma$  power still remained at the parietal  
298 subregion. However, the highest gamma/ $\gamma$  power was drifted towards prefrontal (OUD  
299 and AUD) or frontal subregions (MUD), resulting in changes in the anterior-posterior  
300 relationship.

301

302

## 303 **Approach 5: Analysis of spectral powers across total cortex**

304 Data obtained from 19 electrodes were grouped as mean  $\pm$  SEM representing for  
305 spectral power across the whole cortex. As shown in fig 8, Compared to CTL, spectral  
306 powers in patients with SUD (OUD, MUD or AUD) were significantly altered in delta/ $\delta$   
307 and theta/ $\theta$ , partly alpha/ $\alpha$  or gamma/ $\gamma$  (Fig 8). No effect was observed in the beta/ $\beta$ .

308  
309

## 310 **Discussion**

311 The present study revealed that EEG signals can be decomposed into many  
312 elements and regrouped into multiple datasets, showing characteristic patterns in patients  
313 with OUD compared to those with MUD, AUD, or healthy controls (CTL). It appears  
314 that data regrouping and reanalyzing had no effect on the EEG patterns, but markedly  
315 increased EEG credentials. To obtain an unbiased conclusion, we therefore suggest that  
316 the EEG signals are best viewed from 5 distinct perspectives, including from an  
317 individual electrode aspect, a cortical subregion level, a left-right hemispheric axis, an  
318 anterior-posterior axis, and the cortex as a whole.

319 EEG signals were analyzed with 5 approaches (Table 2). Approach 1 (electrode-  
320 based) analysis has been widely used to determine EEG activity (Polunina & Davydov,  
321 2004; Fingelkurts *et al.*, 2006; Motlagh *et al.*, 2018) because of simplicity without  
322 additional computation. However, changes in EEG signals at individual electrodes often  
323 fail to reach statistical significance. Small sample sizes, which are a major obstacle in the  
324 human studies, were likely attributed to the failure in statistical evaluation. Thus,  
325 increases in sample sizes would solve the question as to whether EEG signals were  
326 indeed altered, as measured at the scalp of patients. It has been suggested that adjacent  
327 electrodes are functionally coherent although such relationship for two distant electrodes,  
328 particularly at different cortical subregions, does not exist (Snyder & Smith, 2015;  
329 Snyder *et al.*, 2018). Findings that EEG amplitudes of adjacent electrodes were at the  
330 same level (Minnerly *et al.*, 2019) support the coherent hypothesis. This suggests that,  
331 despite different electrodes but physical adjacency, their spectral powers could be  
332 grouped to determine functional changes.

333 Taking advantage of this concept, individual electrodes were regrouped according  
334 to cortices and expressed as six subregions using Approach 2 (see details in fig 4). As a  
335 result, it was clearly demonstrated that EEG signals, particularly on delta/ $\delta$ , were  
336 synchronized in patients with OUD and MUD and desynchronized with AUD. However,  
337 the significant difference took place only in OUD patients. Changes in EEG signals  
338 became more easily interpretable in the left-right (Approach 3) and anterior-posterior axis  
339 (Approach 4). The concept of electrical axis, which is widely used for EKG [for instance,  
340 (Schmidt *et al.*, 2018)], was borrowed here for the first time to use in the EEG field.  
341 Findings that the left and right spectral powers were normally at an equal level relative to  
342 the x-axis could be interpreted as similar EEG activity in the two hemispheres. However,  
343 the anterior-posterior axis was no longer in a parallel to x-axis. The observation can be  
344 interpreted as that functional impairments were different at two distinct areas. The  
345 anterior areas are predominated with neurons for cognition, motivation, and execution  
346 while the posteriors are organized with sensory and somatosensory components.  
347 Importantly, the anterior-posterior slope could provide a direct comparison of relative  
348 changes in axis.

349 One argument might be that some of information could be eliminated due to the  
350 grouped analysis of adjacent electrodes or all 19 electrodes together in Approach 5.  
351 Indeed, a conclusion could be partially biased when a single approach is used for data  
352 analysis. Thus, we suggest that all five approaches should be included in the data  
353 analysis. For instance, EEG signals in patients with AUD became desynchronized but  
354 were not statistically significantly different from the CTL when the data were viewed  
355 from individual electrodes (Approach 1). The difference became apparent in Approach 2  
356 despite not being significant. Further increases in sample sizes in Approach 3 and 4  
357 resulted in statistically significant differences from the CTL group. This was supported  
358 by spectral power analysis across the total cortex with Approach 5, showing that, as  
359 sample sizes increased, there were more bands significantly different from the CTL. In  
360 this regard, it appears that five approaches of analyses reveal varying information about  
361 the data. We suggest that all five approaches should be conducted prior to reaching a  
362 conclusion.

363 We found that powers of each EEG spectrum (i.e., delta/ $\delta$ , theta/ $\theta$ , alpha/ $\alpha$ ,  
364 beta/ $\beta$ , or gamma/ $\gamma$ ) could be topographically ranked in an order on cortical subregions.  
365 A “topomap” has been widely adopted and used for understanding functional connections  
366 across cortical networks (Joudaki *et al.*, 2012; Chai *et al.*, 2019). However, what a normal  
367 topomap looks like in a healthy brain is not fully revealed but has been nearly established  
368 in recent years. The consensus for alpha/ $\alpha$  waves is that they show highest activity (i.e.,  
369 “hotspot”) at occipital subregions (Sauseng *et al.*, 2005; Klimesch, 2012; Caplan *et al.*,  
370 2015; Haigh *et al.*, 2018). A possible explanation for such consistency with alpha/ $\alpha$  is  
371 that its power is relatively 5-10 times higher than the other spectra and can be reliably  
372 observed and identified. The prefrontal or frontal cortices are predominately delta/ $\delta$   
373 waves (Tanaka *et al.*, 1997; Caplan *et al.*, 2015; Hinrichs *et al.*, 2020). Interestingly,  
374 hotspots for theta/ $\theta$  and beta/ $\beta$  powers were located mainly at posterior areas, specifically  
375 occipitals, generally in line with previous reports (Chang *et al.*, 2002; Duru *et al.*, 2009;  
376 Hinrichs *et al.*, 2020).

377 Functional connection across cortices is often topographically displayed into  
378 gradients [for instance, (Hinrichs *et al.*, 2020)]. Furthermore, two hemispheres are usually  
379 integrated as a single entity. As a matter of fact, EEG signals at electrodes reflect the  
380 local dendritic spikes that can be propagated 0.5 mm distance (Suzuki & Larkum, 2017)  
381 from the scalp (Snyder *et al.*, 2018). Given that there exists a longitudinal fissure in the  
382 skull, it is unlikely that EEG signals at one hemisphere have a spread electrically to the  
383 counterpart in long-range spatial manner. This view, however, does not contradict the  
384 functional role of the corpus collosum that physically connects two hemispheres. At this  
385 point, EEG signals on two hemispheres should be viewed separately and compared  
386 whether substances could have a selective effect on one side of the hemispheres  
387 (Minnerly *et al.*, 2019).

388 An interesting finding was that the highest power or hotspot was from the  
389 prefrontal area for the delta/ $\delta$  wave with a characteristic ranking order: prefrontal  
390 →frontal →central →parietal →occipital →temporal subregions. In contrast, the theta/ $\theta$ ,  
391 alpha/ $\alpha$ , beta/ $\beta$ , or gamma/ $\gamma$  wave was found at the occipital subregion with unique rank  
392 orders for each spectrum. Taken together, hotspots and/or rank orders of spectral powers



393 could be a physiological feature, which is likely explored as EEG biomarkers to  
394 distinguish the healthy people from those with SUD, as discussed, further below.

395 Delta/ $\delta$  (1-4 Hz) was the band most vulnerable to be alteration in patients with  
396 SUD. As the sample sizes increased, theta/ $\theta$  (4-8 Hz) waves followed by alpha/ $\alpha$  (8-12  
397 Hz) or gamma/ $\gamma$  (25-50 Hz) could be significantly affected. We found that beta/ $\beta$  was the  
398 band least sensitive to any effect of substance use disorders, partly in line with previous  
399 reports (Newton *et al.*, 2003; Greenwald & Roehrs, 2005). Since etiology of those bands  
400 are unknown, it is impossible for us at the present time to interpret why the effects of  
401 SUD impacted primarily at the delta/ $\delta$  wave and secondarily on theta/ $\theta$ , or what could be  
402 the mechanism underlying the beta/ $\beta$  resistance.

403 A drawback in the present study was that there was too much workload on EEG  
404 signal resorting, feature extraction, analysis design and redesign, which were time  
405 consuming. It appears these data analyses could be automatically processed with  
406 software. Recently, it has been suggested that artificial intelligence (AI) and automatic  
407 analysis could apply for some features of EEG signals [for instance, (Golmohammadi *et*  
408 *al.*, 2019)]. To develop such software, the present studies for providing an AI roadmap  
409 are two-fold. First, we suggest that AI should analyze EEG signals from at least five  
410 aspects, such as individual electrodes, cortical subregions, left-right hemispheres,  
411 anterior-posterior axis, and the whole cortex. Second, we suggest that AI should analyze  
412 not only EEG amplitude but also other biomarkers, specifically ranking orders of  
413 amplitudes and electrical axis. It is no doubt that EEG amplitudes were indicative of  
414 mental health alteration by the use of substances. Despite such importance, it cannot  
415 exclude the possibility of bias, so other biomarkers are needed by which the conclusion  
416 can be alternatively corroborated. Results of the present study demonstrate that spectral  
417 powers in the closed-eye state were characteristically altered in not only amplitudes, but  
418 also ranking orders and electrical axis in patients with SUD, providing that multiple  
419 biomarkers can be evaluated. With an ~1-5min sampling time, AI-driven EEG could  
420 emerge as a powerful tool in the future for quick and inexpensive diagnosis on mental  
421 health of patients with SUD.

422

## 423 **Acknowledgments**



424

425 The authors would like to thank FHE Health for granting permission to utilize their data  
426 for this study. We would like to extend our gratitude to the dedicated staff at the  
427 NeuroRehabilitation department at FHE for collecting the data and helping us to make  
428 our work as smooth as possible. Additionally, we thank Dr. Ximena Levy for her  
429 knowledge over human research review and Jeffrey Clark for his excellent IT support,  
430 both of whom are staff at Florida Atlantic University.

431

## 432 **Funding**

433 This research did not receive any specific grant from funding agencies in the public,  
434 commercial, or not-for-profit sectors

435

## 436 **Ethics approval**

437 This research was approved by the Institutional Review Board (IRB) from Florida  
438 Atlantic University (#1223155) and Ross University School of Veterinary Medicine.

439

## 440 **Consent for publication**

441 Not applicable

442

## 443 **Competing interests**

444 None.

445

## 446 **Availability of data and materials**

447 All relevant data are within the manuscript and its supporting information files.

448

449

## 450 **References**

- 451 Ahmed, O.J. & Cash, S.S. (2013) Finding synchrony in the desynchronized EEG: the  
452 history and interpretation of gamma rhythms. *Frontiers in integrative*  
453 *neuroscience*, **7**, 58.  
454
- 455 Baldini, T., Loddo, G., Sessagesimi, E., Mignani, F., Cirignotta, F., Mondini, S.,  
456 Liccheffa, L., Bisulli, F., Tinuper, P. & Provini, F. (2019) Clinical Features and  
457 Pathophysiology of Disorders of Arousal in Adults: A Window Into the Sleeping  
458 Brain. *Frontiers in neurology*, **10**.  
459
- 460 Bauer, L.O. (2001) Predicting relapse to alcohol and drug abuse via quantitative  
461 electroencephalography. *Neuropsychopharmacology : official publication of the*  
462 *American College of Neuropsychopharmacology*, **25**, 332-340.  
463
- 464 Caplan, J.B., Bottomley, M., Kang, P. & Dixon, R.A. (2015) Distinguishing rhythmic  
465 from non-rhythmic brain activity during rest in healthy neurocognitive aging.  
466 *NeuroImage*, **112**, 341-352.  
467
- 468 Chai, M.T., Amin, H.U., Izhar, L.I., Saad, M.N.M., Abdul Rahman, M., Malik, A.S. &  
469 Tang, T.B. (2019) Exploring EEG Effective Connectivity Network in Estimating  
470 Influence of Color on Emotion and Memory. *Front Neuroinform*, **13**, 66.  
471
- 472 Chang, P.F., Arendt-Nielsen, L. & Chen, A.C. (2002) Dynamic changes and spatial  
473 correlation of EEG activities during cold pressor test in man. *Brain Res Bull*, **57**,  
474 667-675.  
475
- 476 Chun, J., Karam, Z.N., Marzinzik, F., Kamali, M., O'Donnell, L., Tso, I.F., Manschreck,  
477 T.C., McInnis, M. & Deldin, P.J. (2013) Can P300 distinguish among  
478 schizophrenia, schizoaffective and bipolar I disorders? An ERP study of response  
479 inhibition. *Schizophrenia research*, **151**, 175-184.  
480
- 481 Coutin-Churchman, P., Moreno, R., Anez, Y. & Vergara, F. (2006) Clinical correlates of  
482 quantitative EEG alterations in alcoholic patients. *Clinical Neurophysiology*, **117**,  
483 740-751.  
484
- 485 Duru, A.D., Ademoglu, A. & Demiralp, T. (2009) Analysis of brain electrical topography  
486 by spatio-temporal wavelet decomposition. *Math Comput Model*, **49**, 2224-2335.  
487
- 488 Dvey-Aharon, Z., Fogelson, N., Peled, A. & Intrator, N. (2015) Schizophrenia Detection  
489 and Classification by Advanced Analysis of EEG Recordings Using a Single  
490 Electrode Approach. *PloS one*, **10**.  
491
- 492 Fingelkurts, A.A., Fingelkurts, A.A., Kivisaari, R., Autti, T., Borisov, S., Puuskari, V.,  
493 Jokela, O. & Kahkonen, S. (2006) Reorganization of the composition of brain

- 494 oscillations and their temporal characteristics in opioid dependent patients.  
495 *Progress in neuro-psychopharmacology & biological psychiatry*, **30**, 1453-1465.  
496
- 497 Golmohammadi, M., Harati Nejad Torbati, A.H., Lopez de Diego, S., Obeid, I. & Picone,  
498 J. (2019) Automatic Analysis of EEGs Using Big Data and Hybrid Deep Learning  
499 Architectures. *Frontiers in human neuroscience*, **13**, 76.  
500
- 501 Greenwald, M.K. & Roehrs, T.A. (2005) Mu-opioid self-administration vs passive  
502 administration in heroin abusers produces differential EEG activation.  
503 *Neuropsychopharmacology : official publication of the American College of*  
504 *Neuropsychopharmacology*, **30**, 212-221.  
505
- 506 Haigh, S.M., Cooper, N.R. & Wilkins, A.J. (2018) Chromaticity separation and the alpha  
507 response. *Neuropsychologia*, **108**, 1-5.  
508
- 509 Hinrichs, H., Scholz, M., Baum, A.K., Kam, J.W.Y., Knight, R.T. & Heinze, H.J. (2020)  
510 Comparison between a wireless dry electrode EEG system with a conventional  
511 wired wet electrode EEG system for clinical applications. *Scientific reports*, **10**,  
512 5218.  
513
- 514 Joudaki, A., Salehi, N., Jalili, M. & Knyazeva, M.G. (2012) EEG-based functional brain  
515 networks: does the network size matter? *PloS one*, **7**, e35673.  
516
- 517 Khajehpour, H., Makkiabadi, B., Ekhtiari, H., Bakht, S., Noroozi, A. & Mohagheghian,  
518 F. (2019) Disrupted resting-state brain functional network in methamphetamine  
519 abusers: A brain source space study by EEG. *PloS one*, **14**, e0226249.  
520
- 521 Klimesch, W. (2012) alpha-band oscillations, attention, and controlled access to stored  
522 information. *Trends in cognitive sciences*, **16**, 606-617.  
523
- 524 Ko, S. & Park, W. (2018) Effects of Quantitative Electroencephalography Based  
525 Neurofeedback Training on Autonomous Regulations in Patients with Alcohol  
526 Use Disorder. *Asian Nurs Res*, **12**, 136-144.  
527
- 528 Liao, D., Lin, H., Law, P.Y. & Loh, H.H. (2005) Mu-opioid receptors modulate the  
529 stability of dendritic spines. *Proceedings of the National Academy of Sciences of*  
530 *the United States of America*, **102**, 1725-1730.  
531
- 532 Liu, Q., Chen, Y.F., Fan, S.Z., Abbod, M.F. & Shieh, J.S. (2016) A comparison of five  
533 different algorithms for EEG signal analysis in artifacts rejection for monitoring  
534 depth of anesthesia. *Biomed Signal Proces*, **25**, 24-34.  
535
- 536 McCann, U.D., Wong, D.F., Yokoi, F., Villemagne, V., Dannals, R.F. & Ricaurte, G.A.  
537 (1998) Reduced striatal dopamine transporter density in abstinent  
538 methamphetamine and methcathinone users: evidence from positron emission

- 539 tomography studies with [11C]WIN-35,428. *The Journal of neuroscience : the*  
540 *official journal of the Society for Neuroscience*, **18**, 8417-8422.
- 541
- 542 Minnerly, C., Bressler, S.L., Shokry, I.M. & Tao, R. (2019) Estimating Mental Health  
543 Conditions of Patients with Opioid Use Disorder. *J Addict*, **2019**, 8586153.
- 544
- 545 Motlagh, F., Ibrahim, F., Rashid, R., Shafiabady, N., Seghatoleslam, T. & Habil, H.  
546 (2018) Acute effects of methadone on EEG power spectrum and event-related  
547 potentials among heroin dependents. *Psychopharmacology*, **235**, 3273-3288.
- 548
- 549 Newton, T.F., Cook, I.A., Kalechstein, A.D., Duran, S., Monroy, F., Ling, W. &  
550 Leuchter, A.F. (2003) Quantitative EEG abnormalities in recently abstinent  
551 methamphetamine dependent individuals. *Clinical neurophysiology : official*  
552 *journal of the International Federation of Clinical Neurophysiology*, **114**, 410-  
553 415.
- 554
- 555 Olsen, R.W. & Liang, J. (2017) Role of GABA(A) receptors in alcohol use disorders  
556 suggested by chronic intermittent ethanol (CIE) rodent model. *Mol Brain*, **10**.
- 557
- 558 Pittau, F., Grouiller, F., Spinelli, L., Seeck, M., Michel, C.M. & Vulliemoz, S. (2014)  
559 The role of functional neuroimaging in pre-surgical epilepsy evaluation. *Frontiers*  
560 *in neurology*, **5**.
- 561
- 562 Plummer, C., Vogrin, S.J., Woods, W.P., Murphy, M.A., Cook, M.J. & Liley, D.T.J.  
563 (2019) Interictal and ictal source localization for epilepsy surgery using high-  
564 density EEG with MEG: a prospective long-term study. *Brain : a journal of*  
565 *neurology*, **142**, 932-951.
- 566
- 567 Polunina, A.G. & Davydov, D.M. (2004) EEG spectral power and mean frequencies in  
568 early heroin abstinence. *Progress in neuro-psychopharmacology & biological*  
569 *psychiatry*, **28**, 73-82.
- 570
- 571 Sauseng, P., Klimesch, W., Doppelmayr, M., Pecherstorfer, T., Freunberger, R. &  
572 Hanslmayr, S. (2005) EEG alpha synchronization and functional coupling during  
573 top-down processing in a working memory task. *Human brain mapping*, **26**, 148-  
574 155.
- 575
- 576 Schmidt, D.C., Andersson, C. & Schultz, H.H. (2018) ECG with alternating electric axis  
577 in relation to left-sided tension pneumothorax: a case report and review of the  
578 literature. *Eur Clin Respir J*, **5**, 1495982.
- 579
- 580 Shim, M., Hwang, H.J., Kim, D.W., Lee, S.H. & Im, C.H. (2016) Machine-learning-  
581 based diagnosis of schizophrenia using combined sensor-level and source-level  
582 EEG features. *Schizophrenia research*, **176**, 314-319.
- 583

- 584 Snyder, A.C., Issar, D. & Smith, M.A. (2018) What does scalp electroencephalogram  
585 coherence tell us about long-range cortical networks? *The European journal of*  
586 *neuroscience*, **48**, 2466-2481.  
587
- 588 Snyder, A.C. & Smith, M.A. (2015) Stimulus-dependent spiking relationships with the  
589 EEG. *Journal of neurophysiology*, **114**, 1468-1482.  
590
- 591 Stone, J.L. & Hughes, J.R. (2013) Early history of electroencephalography and  
592 establishment of the American Clinical Neurophysiology Society. *Journal of*  
593 *clinical neurophysiology : official publication of the American*  
594 *Electroencephalographic Society*, **30**, 28-44.  
595
- 596 Suzuki, M. & Larkum, M.E. (2017) Dendritic calcium spikes are clearly detectable at the  
597 cortical surface. *Nature communications*, **8**, 276.  
598
- 599 Tanaka, H., Hayashi, M. & Hori, T. (1997) Topographical characteristics and principal  
600 component structure of the hypnagogic EEG. *Sleep*, **20**, 523-534.  
601
- 602 Taylor, J.A. & Garrido, M.I. (2020) Porthole and Stormcloud: Tools for Visualisation of  
603 Spatiotemporal M/EEG Statistics. *Neuroinformatics*, **18**, 351-363.  
604
- 605 Thatcher, R.W. (2010) Validity and reliability of quantitative electroencephalography. *J*  
606 *Neurotherapy*, **14**, 122-152.  
607
- 608 Turetsky, B.I., Dress, E.M., Braff, D.L., Calkins, M.E., Green, M.F., Greenwood, T.A.,  
609 Gur, R.E., Gur, R.C., Lazzeroni, L.C., Nuechterlein, K.H., Radant, A.D.,  
610 Seidman, L.J., Siever, L.J., Silverman, J.M., Sprock, J., Stone, W.S., Sugar, C.A.,  
611 Swerdlow, N.R., Tsuang, D.W., Tsuang, M.T. & Light, G. (2015) The utility of  
612 P300 as a schizophrenia endophenotype and predictive biomarker: Clinical and  
613 socio-demographic modulators in COGS-2. *Schizophrenia research*, **163**, 53-62.  
614
- 615 Wang, G.Y., Kydd, R., Wouldes, T.A., Jensen, M. & Russell, B.R. (2015) Changes in  
616 resting EEG following methadone treatment in opiate addicts. *Clinical*  
617 *neurophysiology : official journal of the International Federation of Clinical*  
618 *Neurophysiology*, **126**, 943-950.  
619  
620  
621

622 **Fig 1. EEG data acquisition.** (A) A 19-channel EEG cap (from Electro-Cap  
623 International, Inc. Eaton, OH, USA) used for collecting data. (B) QCheck electrode  
624 impedance monitor and Q21 amplifier (Neurofield, Inc., Bishop, CA, USA). (C) A  
625 diagram of the International 10-20 System to elaborate electrode placement across the  
626 scalp. (D) An example of a digitized EEG recording using Neuroguide software (Applied  
627 Neuroscience, Inc. Largo, FL, USA).

628

629 **Fig 2. Topographic analysis of the EEG bands at cortical subregions of the healthy**  
630 **brains (N =20).** The y-axis indicates spectral powers ( $\mu V^2$ ) plotted against 6 cortical  
631 subregions displaying in x-axis. Data are expressed as the rank orders from the highest to  
632 lowest powers in the subregions. Except for delta/ $\delta$  waves (A), the highest amplitude  
633 powers were found in the occipital subregion with characteristic rank orders.  
634 Specifically, the theta/ $\theta$  powers (B) were found in a rank order of O  $\rightarrow$  P  $\rightarrow$  Cz  $\rightarrow$  F  $\rightarrow$  Fp  
635  $\rightarrow$  T). \* P<0.05 and \*\*P<0.01 vs. 1=O; #P<0.05 and ##P<0.01 vs. 2=P;  $\phi$ P<0.05 vs. 3=Cz.  
636 The rank orders for alpha/ $\alpha$  (C) and beta/ $\beta$  (D) were identical, displaying O  $\rightarrow$  P  $\rightarrow$  Cz  
637  $\rightarrow$  T  $\rightarrow$  F  $\rightarrow$  Fp. \*\*P<0.01 and \*\*\*P<0.001 vs. 1=O; #P<0.05, ##P<0.01 and ###P<0.001 vs.  
638 2=P. Interestingly, the gamma/ $\gamma$  powers were the highest at the occipital subregion and  
639 made a turn to the temporal lobe and then the prefrontal subregion, and finally ended at  
640 the lowest power in the parietal subregion. \*\*P<0.01 vs. 1=O; #P<0.05 vs. 2=T. In  
641 contrast, the highest amplitude powers for delta/ $\delta$  waves were in the frontal subregions  
642 followed by rear subregions, and then the temporal lobes (Fp  $\rightarrow$  F  $\rightarrow$  Cz  $\rightarrow$  P  $\rightarrow$  O  $\rightarrow$  T).  
643 \*\*P<0.01 and \*\*\*P<0.001 vs. 1=O; ##P<0.01 vs. 2=F;  $\phi$ P<0.01 vs. 3=Cz;  $\psi$ P< vs. 4=P;  
644  $\omega$ P<0.05 vs. 5=O.

645

646 **Fig 3. Effects on delta/ $\delta$  powers at 19 individual electrodes of patients with OUD,**  
647 **MUD or AUD.** A, Representative delta/ $\delta$  waves in the F3 electrode from CTL, OUD,  
648 MUD and AUD. B, F3 delta/ $\delta$  powers expressed as absolute values ( $\mu V^2$ ; left panel) or  
649 100% CTL level (right panel). C, Frontal delta/ $\delta$  powers. D, Central delta/ $\delta$  powers. E,  
650 Temporal delta/ $\delta$  powers. F, Parietal delta/ $\delta$  powers. G, Occipital delta/ $\delta$  powers. \*P  
651 <0.05 vs. CTL.



652

653 **Fig 4. Phenotypic changes of spectral powers in cortical subregions.** Numbers in x-  
654 axis indicate cortical subregions. 1, prefrontal; 2, frontal; 3, central; 4, temporal; 5,  
655 parietal; 6, occipital. In the case of OUD and MUD, delta/ $\delta$  (**A**) and theta/ $\theta$  powers (**B**)  
656 appeared to be elevated in all 6 cortical subregions as compared to CTL. In contrast,  
657 alpha/ $\alpha$  powers (**C**) were lower than the CTL. There was no clear pattern for beta/ $\beta$  (**D**) or  
658 gamma/ $\gamma$  powers (**E**). Regarding AUD, spectral powers for delta/ $\delta$ , theta/ $\theta$  and alpha/ $\alpha$   
659 bands were lower than the CTL. No clear pattern for beta/ $\beta$  or gamma/ $\gamma$  bands was found.  
660 \* $P < 0.05$ , and \*\* $P < 0.01$  vs. CTL, a post-hoc Fisher's PLSD test followed by ANOVA.  
661

662 **Fig 5. Left hemispheric spectral powers compared with the right hemispheric**  
663 **subregions.** Numbers in x-axis denote the left and right hemispheres as 1 and 2,  
664 respectively. Data are expressed as mean  $\pm$  SEM. Compared to CTL, OUD and MUD had  
665 an elevated power of delta/ $\delta$  (**A**) and theta/ $\theta$  (**B**) waves but a reduced alpha/ $\alpha$  wave (**C**).  
666 In contrast, all three waves were reduced in AUD. No change was observed as the data  
667 expressed as hemispheric beta/ $\beta$  (**D**) or gamma/ $\gamma$  powers (**E**).  
668

669 **Fig 6. Anterior spectral powers compared with the posterior subregions.** Numbers in  
670 x-axis denote the anterior and posterior powers as 1 and 2, respectively. Data are  
671 expressed as mean  $\pm$  SEM. Compared to CTL, OUD and MUD had an elevated power of  
672 delta/ $\delta$  (**A**) and theta/ $\theta$  (**B**) waves but a reduced alpha/ $\alpha$  wave (**C**). In contrast, all three  
673 waves were reduced in AUD. No change was observed in the beta/ $\beta$  (**D**) or gamma/ $\gamma$   
674 powers (**E**).

675

676 **Fig 7. A, Gamma/ $\gamma$  power in the cortical subregions altered in drug use disorders.**  
677 \* $P < 0.05$ , \*\* $P < 0.01$ , and \*\*\* $P < 0.001$  vs. CTL, a post-hoc Fisher's PLSD test followed by  
678 ANOVA. **B, Topographic analysis of gamma/ $\gamma$  power.** Compared to the CTL, the lowest  
679 gamma/ $\gamma$  power still remained at the parietal subregion while the highest power was  
680 drifted toward the prefrontal (OUD and AUD) or frontal subregion (MUD).

681



682 **Fig 8. Analysis of spectral powers as a whole across cortex.** Data are expressed as  
683 mean  $\pm$  SEM. Compared to CTL, spectral powers in patients with SUD (OUD, MUD or  
684 AUD) were significantly altered in delta/ $\delta$  (**A**) and theta/ $\theta$  (**B**), partly alpha/ $\alpha$  (**C**) or  
685 gamma/ $\gamma$  (**E**). No effect was observed in the beta/ $\beta$  (**D**). \*\* $P < 0.01$ , and \*\*\* $P < 0.001$  vs.  
686 CTL, unpaired t-test.

687

## 688 **Supporting information**

689 **S1. Effects on theta/ $\theta$  powers at 19 individual electrodes of patients with OUD, MUD**  
690 **or AUD.** Data were expressed as % CTL **A**, Frontal. **B**, Central. **C**, Temporal. **D**,  
691 Parietal. **E**, Occipital. Overall, MUD or OUD theta/ $\theta$  powers  $>$ CTL  $>$ AUD. However,  
692 OUD, MUD or AUD was not different from the CTL ( $P > 0.05$ ).

693

694 **S2. Effects on alpha/ $\alpha$  powers at 19 individual electrodes of patients with OUD,**  
695 **MUD or AUD.** Data were expressed as % CTL. **A**, Frontal. **B**, Central. **C**, Temporal. **D**,  
696 Parietal. **E**, Occipital. Overall, CTL alpha/ $\alpha$  power  $>$ OUD  $>$ MUD  $>$ AUD. OUD, MUD or  
697 AUD was not different from the CTL ( $P > 0.05$ ).

698

699 **S3. Effects on beta/ $\beta$  powers at 19 individual electrodes of patients with OUD, MUD**  
700 **or AUD.** Data were expressed as % CTL. **A**, Frontal. **B**, Central. **C**, Temporal. **D**,  
701 Parietal. **E**, Occipital. OUD, MUD or AUD was not different from the CTL ( $P > 0.05$ )

702

703 **S4. Effects on gamma/ $\gamma$  powers at 19 individual electrodes of patients with OUD,**  
704 **MUD or AUD.** Data were expressed as % CTL. **A**, Frontal gamma/ $\gamma$  powers. **B**, Central  
705 gamma/ $\gamma$  powers. **C**, Temporal gamma/ $\gamma$  powers. **D**, Parietal gamma/ $\gamma$  powers. **E**,  
706 Occipital gamma/ $\gamma$  powers. OUD, MUD or AUD was not different from the CTL  
707 ( $P > 0.05$ )

708

709

710

711

Fig 1

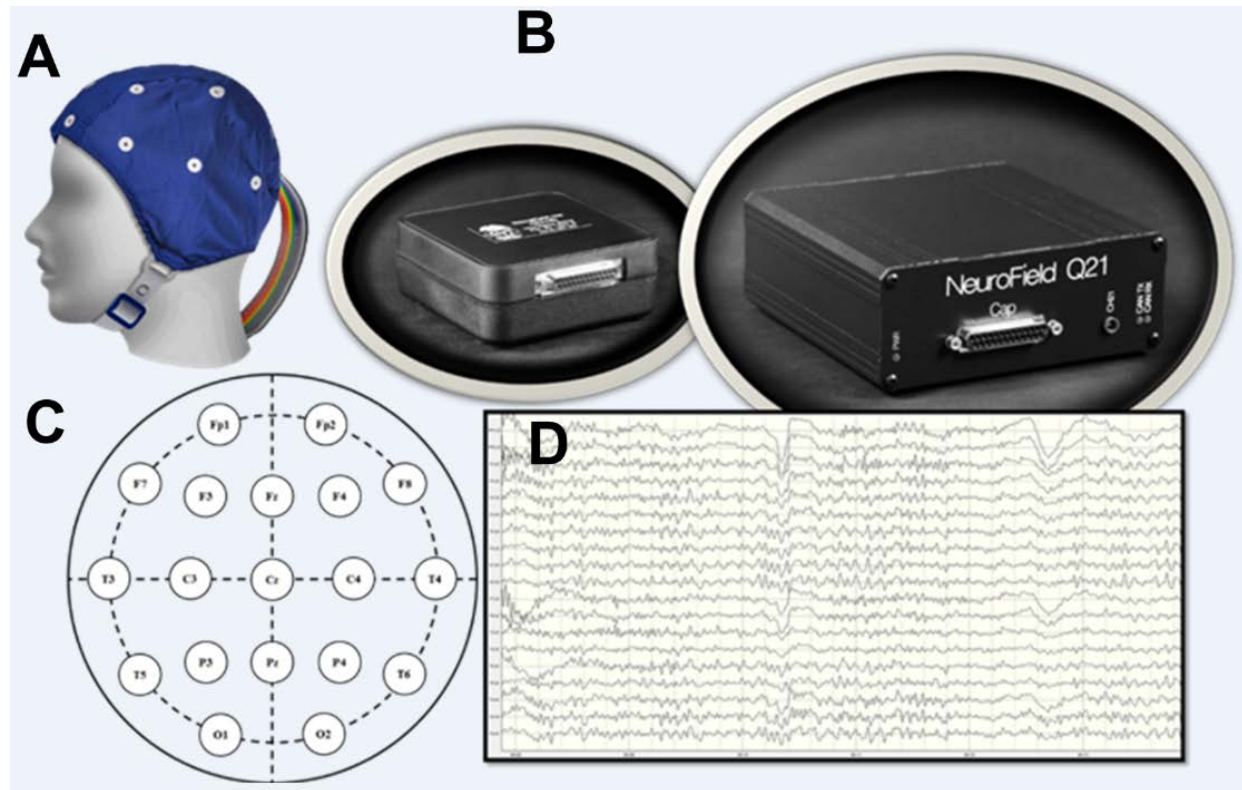

Fig 2

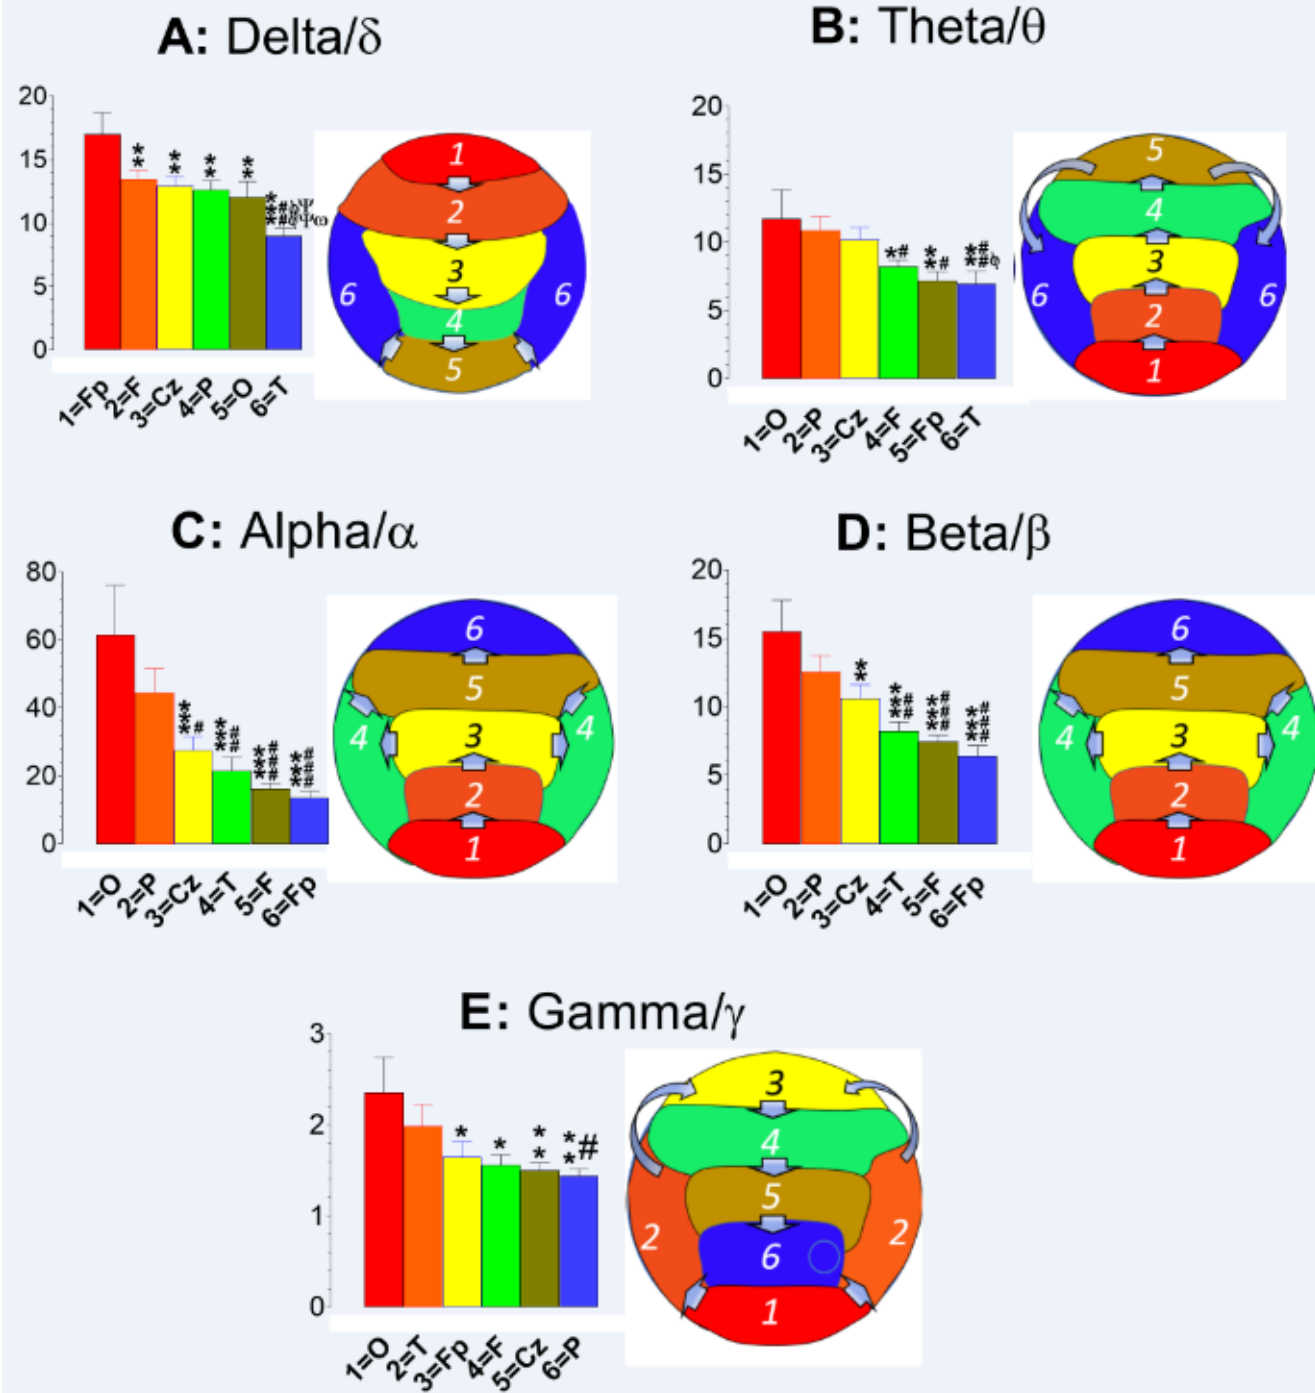

Fig 3

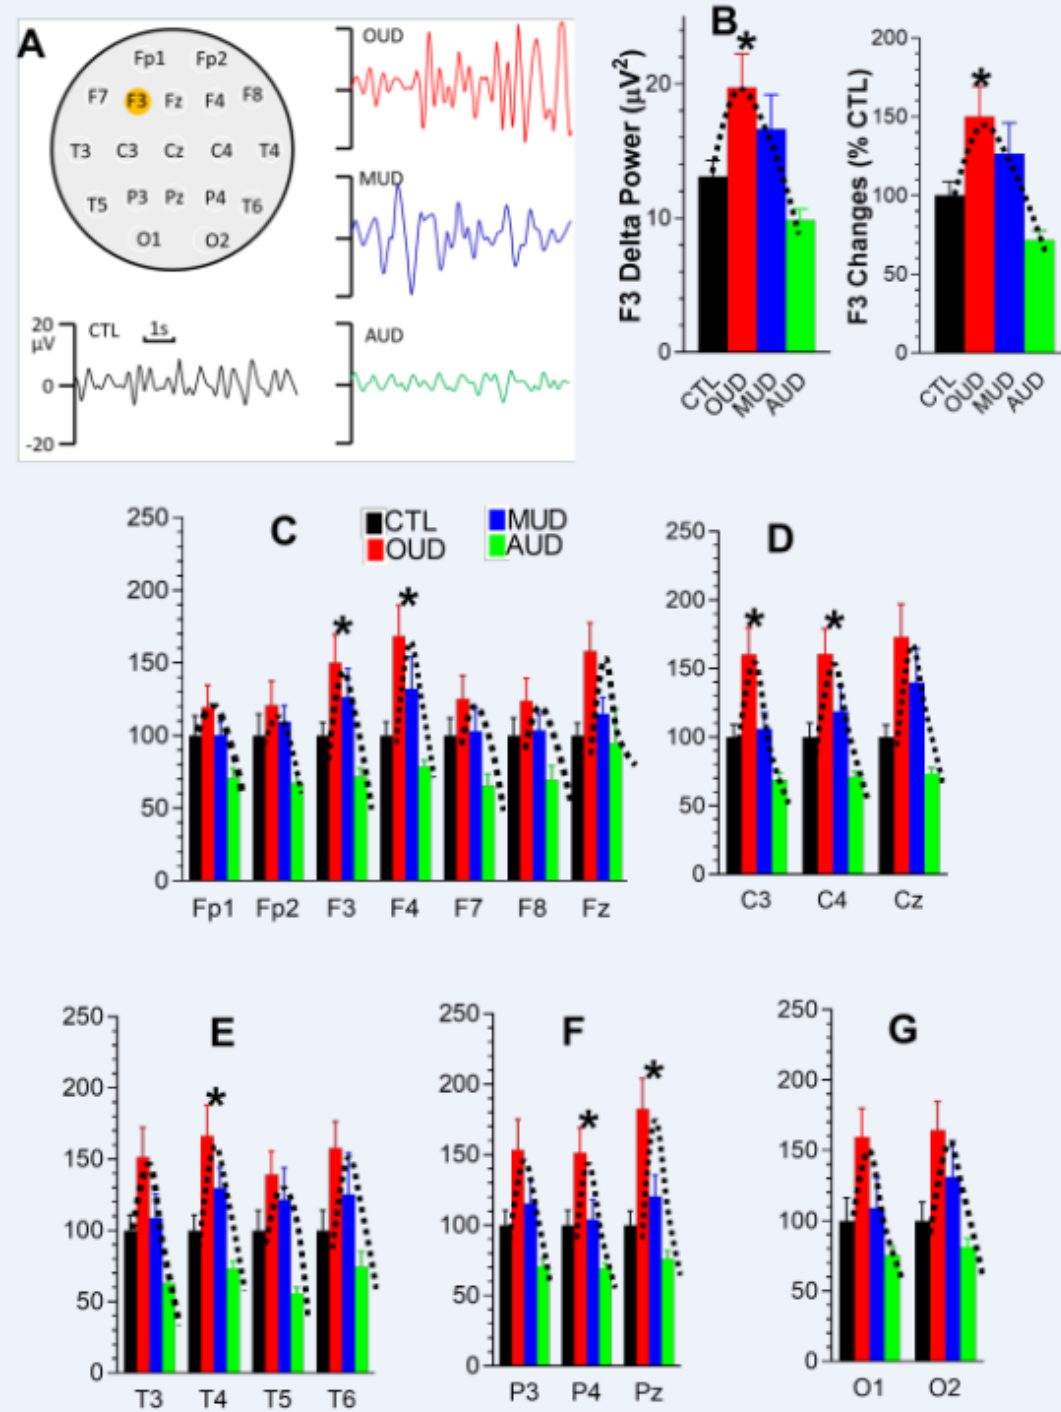

Fig 4

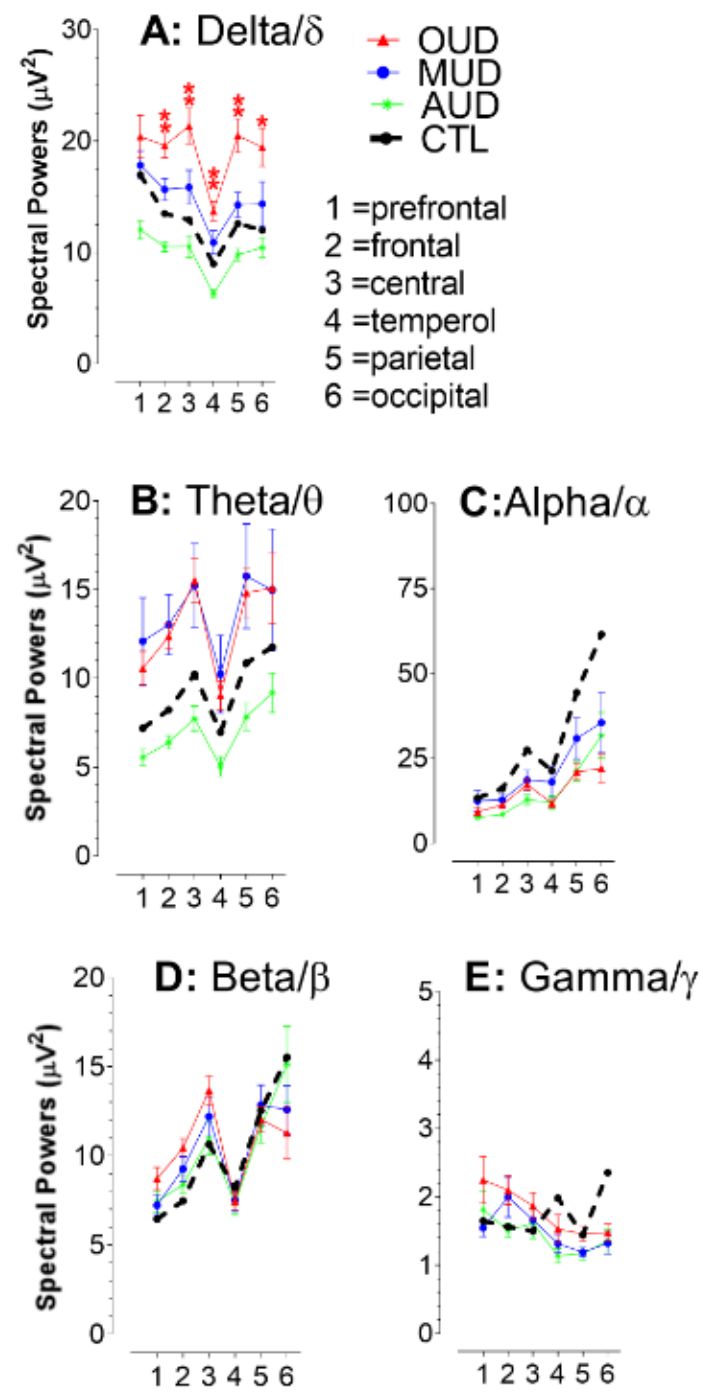

Fig 5

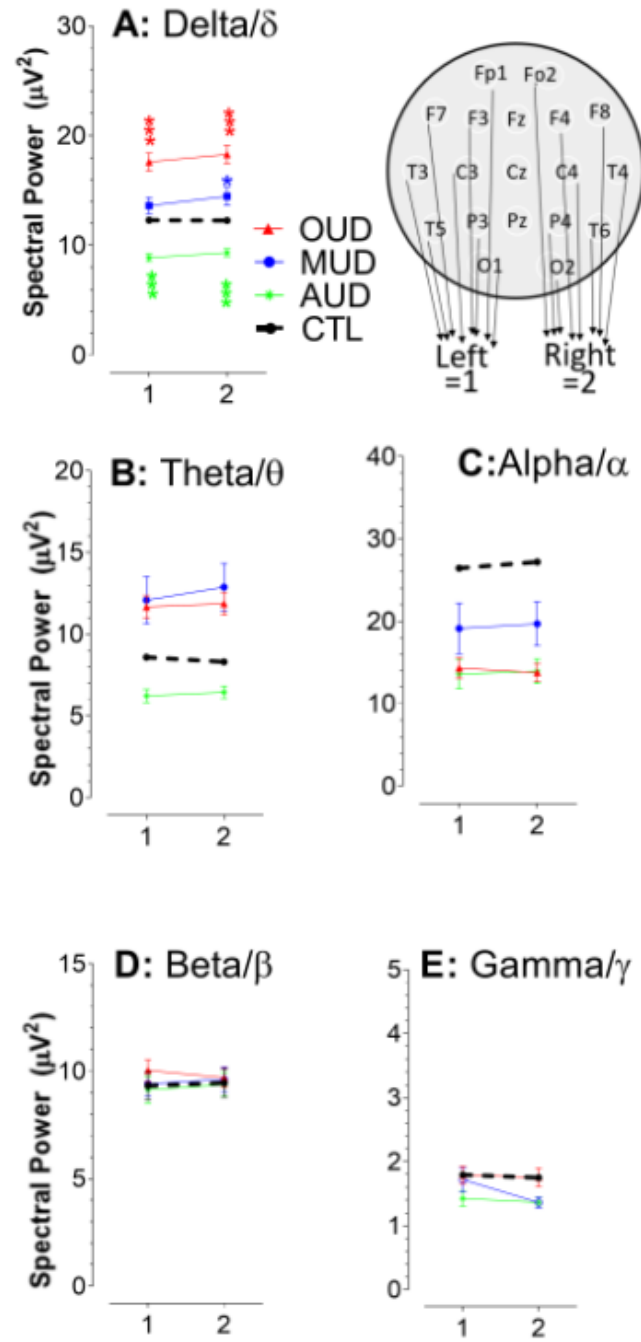

Fig 6

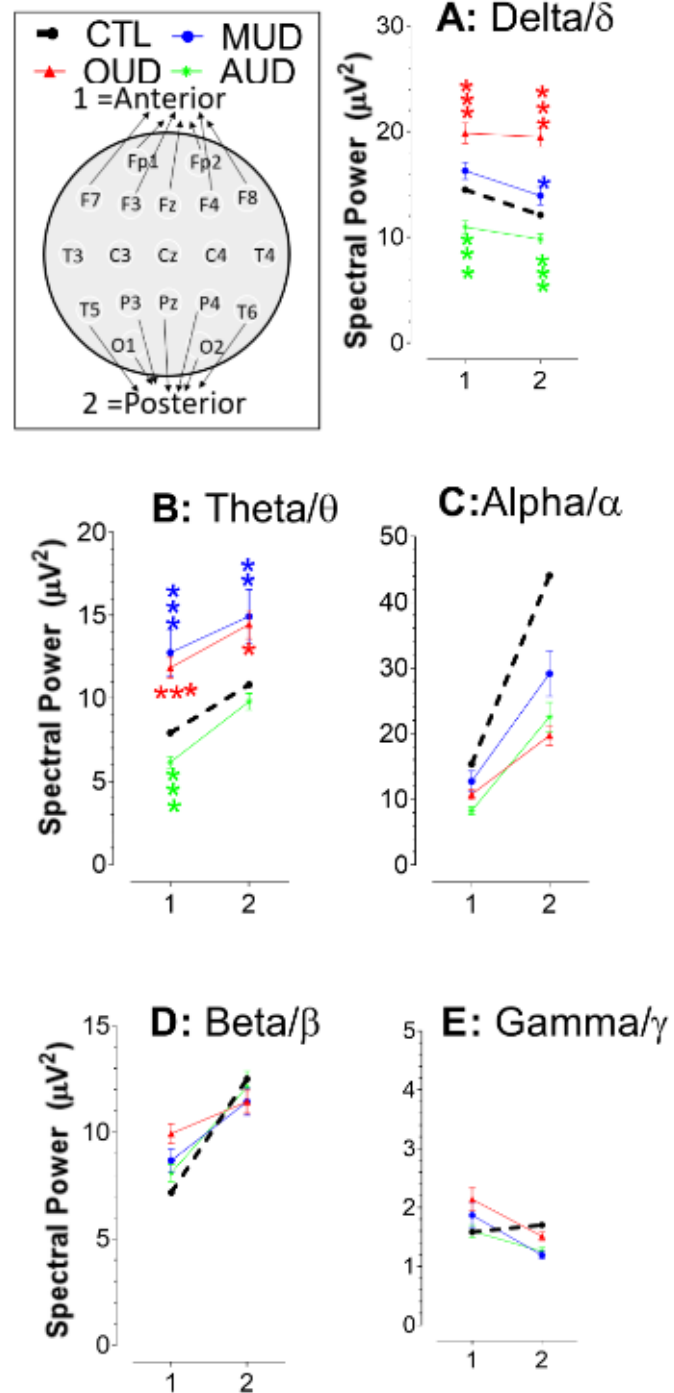

Fig 7

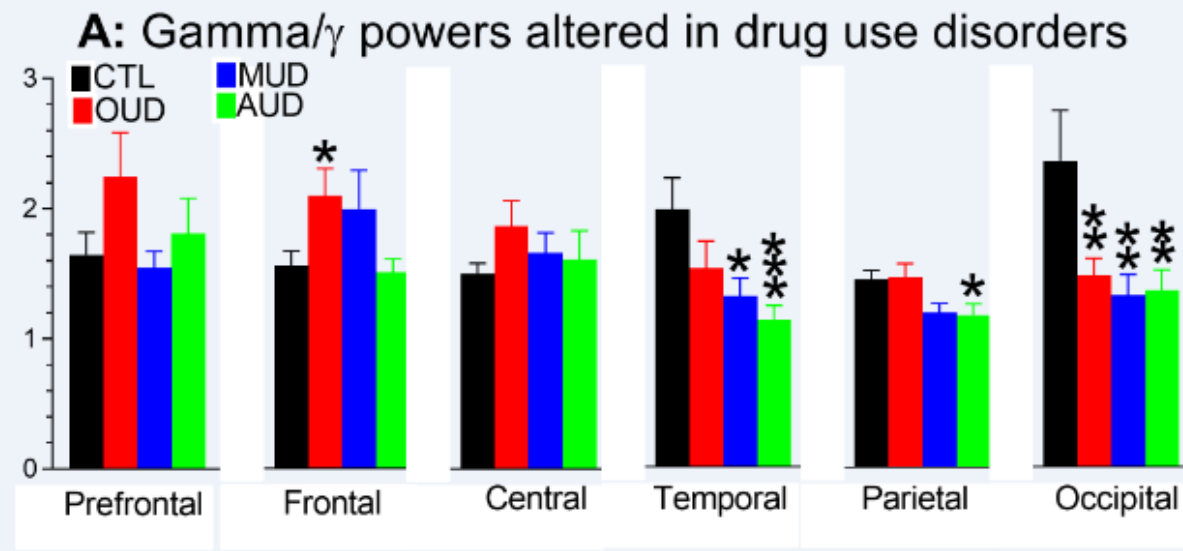

### B: Topographic analysis of gamma/ $\gamma$ power

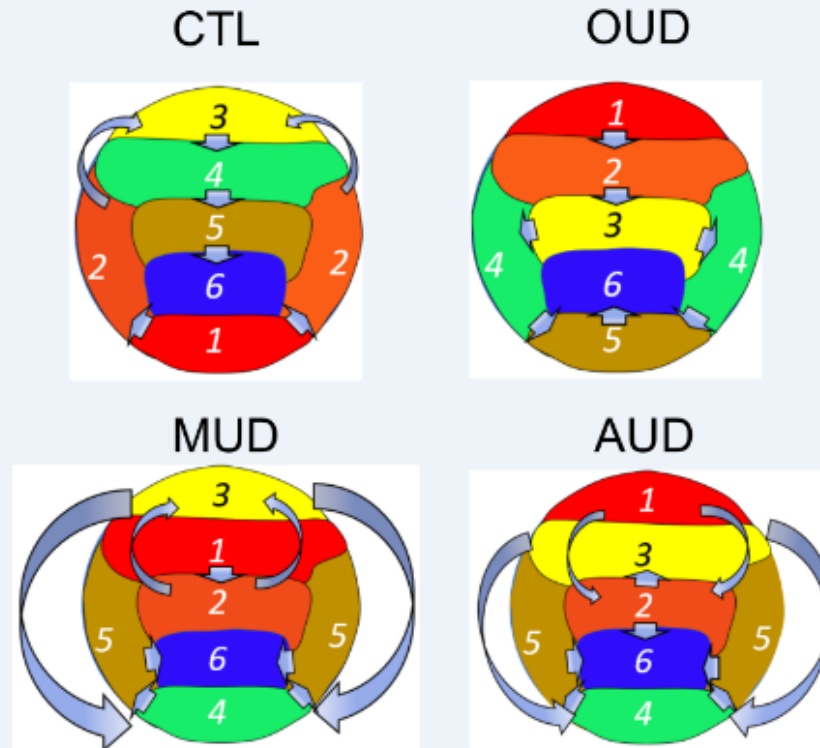



Fig 8

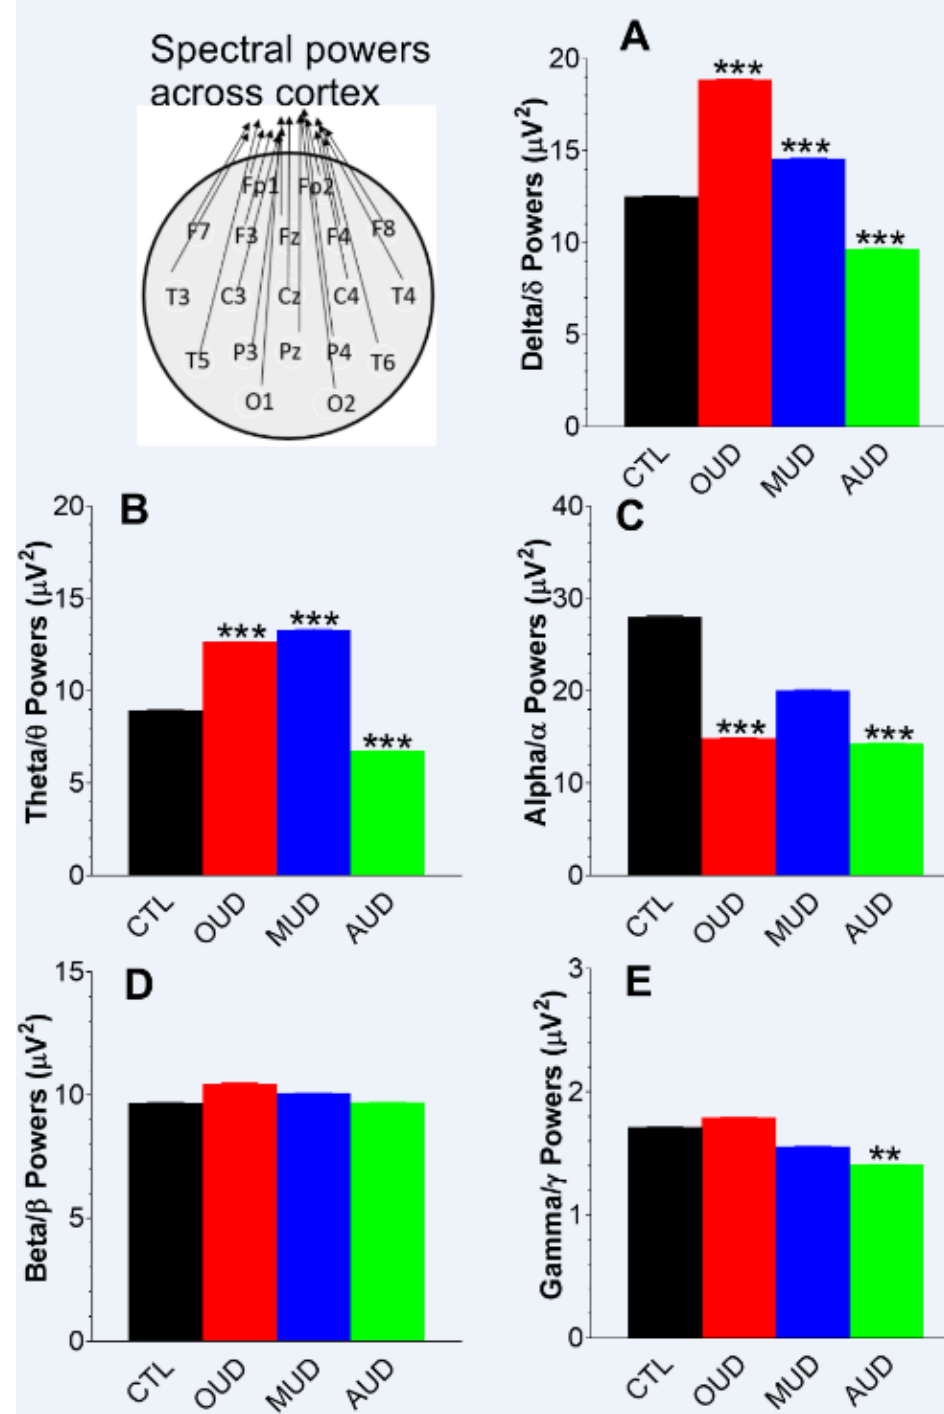

Source: https://www.biorxiv.org/content/10.1101/2021.04.13.439656v1.full.pdf
